# 1 **Integrative Omics Reveals Subtle Molecular Perturbations Following**

## 2 **Ischemic Conditioning in a Porcine Kidney Transplant Model**

3 Darragh P. O'Brien<sup>1\*</sup>, Adam M. Thorne<sup>1,2\*</sup>, Honglei Huang<sup>1,2</sup>, Xuan Yao<sup>1</sup>, Peter Søndergaard  
4 Thyrrstrup<sup>3,4</sup>, Kristian Ravlo<sup>3,5</sup>, Niels Secher<sup>5,6</sup>, Rikke Norregaard<sup>3,5</sup>, Rutger J. Ploeg<sup>2</sup>, Bente  
5 Jespersen<sup>3,5</sup>, Benedikt M. Kessler<sup>1</sup>

6 <sup>1</sup>Target Discovery Institute, Centre for Medicines Discovery, Nuffield Department of Medicine,  
7 University of Oxford, UK

8 <sup>2</sup>Nuffield Department of Surgical Sciences and Oxford Biomedical Research Centre, University  
9 of Oxford, UK

10 <sup>3</sup>Department of Renal Medicine, Aarhus University Hospital, Aarhus, Denmark

11 <sup>4</sup>Department of Anaesthesiology, Aalborg University Hospital, Aalborg Denmark

12 <sup>5</sup>Department of Clinical Medicine, Aarhus University, Aarhus, Denmark

13 <sup>6</sup>Department of Anaesthesiology and Intensive Care Medicine, Aarhus University Hospital, Aarhus  
14 Denmark

15 \*these authors contributed equally

16

17 Corresponding authors:

18 darragh.obrien@ndm.ox.ac.uk; rutger.ploeg@nds.ox.ac.uk; bente.jespersen@clin.au.dk;

19 benedikt.kessler@ndm.ox.ac.uk

20 Running Title:

21 Integrative Omic Profiling of a Porcine Kidney Transplant Model

22 **ABSTRACT**

23 **Background:** Remote Ischemic Conditioning (RIC) has been proposed as a therapeutic intervention to  
24 circumvent the Ischemia/reperfusion injury (IRI) that is inherent to organ transplantation. Using a  
25 porcine kidney transplant model, we aimed to decipher the subclinical molecular effects of a RIC  
26 regime, compared to non-RIC controls.

27 **Methods:** Kidney pairs (n = 8+8) were extracted from brain dead donor pigs and transplanted in  
28 juvenile recipient pigs following a period of cold ischemia. One of the two kidney recipients in each  
29 pair was subjected to RIC prior to kidney graft reperfusion, while the other served as non-RIC control.  
30 We designed an advanced integrative Omics strategy combining transcriptomics, proteomics, and  
31 phosphoproteomics to deduce molecular signatures in kidney tissue that could be attributed to RIC.

32 **Results:** In kidney grafts taken out 10 h after transplantation we detected minimal molecular  
33 perturbations following RIC compared to non-RIC at the transcriptome level, but more pronounced  
34 effects at the proteome level. In particular, we noted that RIC resulted in suppression of tissue  
35 inflammatory profiles. Furthermore, an accumulation of muscle extracellular matrix assembly proteins  
36 in kidney tissues was detected at the protein level, which may be in response to muscle tissue damage  
37 and/or fibrosis.

38 **Conclusions:** Our data identifies subtle molecular phenotypes in porcine kidneys following RIC and  
39 this knowledge could potentially aid optimisation of remote ischaemia protocols in renal  
40 transplantation.

41

42 Key Words:

43 Remote Ischemic Conditioning, Kidney Transplantation, Proteomics, Transcriptomics, Integrative  
44 Omics, Inflammation

45

## 46 **BACKGROUND**

47 Organ donation and transplantation inevitably involve periods of both warm and cold ischemia, as a  
48 consequence of diminished or restricted blood flow, which deprives the donor organ tissue of the  
49 oxygen required to maintain cellular metabolism. Subsequent reperfusion at time of implantation of  
50 the ischaemic graft results in tissue damage including several molecular hallmarks, such as hypoxic  
51 stress and production of reactive oxygen species, a rapid reduction of ATP levels, intracellular acidosis,  
52 and diminished nutritional supplies [1]. Combined, these insults lead to the activation of apoptotic  
53 and necrotic pathways, and if uncorrected, to graft fibrosis, organ dysfunction, and eventually  
54 rejection [2]. Acute kidney injury (AKI) induced by ischaemia and subsequent reperfusion is called  
55 delayed graft function in the clinical transplant setting and leads to the need of dialysis as well as a  
56 risk of poorer transplant outcome [3]. Remote ischaemic conditioning (RIC) has been proposed as a  
57 therapeutic modality to mitigate the effects of ischaemia/reperfusion injury (IRI) in organ  
58 transplantation [4, 5]. RIC is a simple procedure which involves short and repetitive cycles of non-  
59 damaging ischaemia, usually applied to a leg or arm, which may reduce damaging effects caused by  
60 IRI in the target organ. RIC has shown various outcomes in pre-clinical studies across different organs  
61 such as lung, liver, small intestine and in a variety of situations and species [6-11]. Several studies have  
62 demonstrated a reduction in IRI and improved early graft function in the recipient [12-15]. Regarding  
63 kidney transplantation and AKI, a protective effect of RIC in rodent renal models has been described,  
64 however the transition into the human setting has been challenging [14, 16]. Our previous work in a  
65 porcine model of kidney transplantation suggested a beneficial effect of RIC on early graft perfusion  
66 and function evidenced by a significantly improved renal plasma perfusion and glomerular filtration  
67 rate (GFR) [17]. When RIC was applied to kidney transplant patients in a clinical trial (CONTEXT), no  
68 clinical benefit was observed but this trial revealed distinct subclinical effects on kidney transplants at  
69 the molecular level [18]. In continuation of this, we revisited our RIC study carried out in pigs showing  
70 the potential positive effects of RIC that were actually the background for the CONTEXT study. Using  
71 samples obtained from our original porcine RIC model [17], we sought to identify possible proteomic

72 and transcriptomic changes in recipient tissue using advanced quantitative mass spectrometry and  
73 RNA sequencing. In this study, we describe altered molecular profiles comparable to the ones  
74 observed in human kidneys subjected to RIC.

75

## 76 **METHODS**

### 77 **Transplant model**

78 The effects of RIC versus non-RIC controls in porcine kidney transplants were evaluated in a paired  
79 randomised study, the design of which was described in detail by Soendergaard et al. [17]. Briefly,  
80 eight kidney pairs were taken from eight brain-dead donor pigs (60-64 kg) and transplanted into  
81 sixteen bilateral nephrectomised recipient pigs (14–16 kg), which were randomly given RIC or non-RIC  
82 within each pair. Prior to organ reperfusion, RIC was performed as indicated below. Pigs were  
83 surveyed, under anaesthesia, for 10 h after transplantation, assessing renal function by GFR, renal  
84 plasma perfusion and known renal biomarkers. The study was approved by the National Committee  
85 on Animal Research Ethics no. 2008-561-1584 (Animal Experiments Inspectorate, Copenhagen,  
86 Denmark) and conducted in accordance with the “Principles of Laboratory Animal Care” (NIH  
87 publication Vol. 25, No. 28 revised 1996).

### 88 **Sample retrieval and ischemia regimen**

89 Kidney retrieval, transplantation and RIC was performed by experienced transplant surgeons as  
90 described previously (**Figure 1**) [17]. Briefly, female Danish Landrace pigs were anaesthetised and  
91 placed under mechanical ventilation. Ringer's acetate was infused to maintain fluid balance and  
92 arterial pressure. Brain death was induced by increasing intracranial pressure. Kidneys were extracted,  
93 perfused and stored in 5°C cold storage solution. Two recipients were transplanted simultaneously  
94 after having their native kidneys removed. A RIC regimen was undertaken whereby the abdominal  
95 aorta was clamped above the aortic bifurcation but below the renal arteries in four cycles, with each

96 cycle consisting of 5 min of ischaemia and 5 min of reperfusion. Surgeons and investigators were  
97 unblinded to the treatment during the experiments. Renal biopsies from kidneys in the RIC and non-  
98 RIC groups were taken prior to termination after 10 hours reperfusion and snap frozen in liquid  
99 nitrogen for transcriptomic and proteomic analysis.

## 100 **Transcriptomics analysis**

101 **Sample preparation.** Sixteen tissue samples (weighing approximately 20 mg) were lysed using a  
102 Precellys 24 homogeniser (Bertin Instruments) in 350  $\mu$ L of RNeasy Mini kit RLT lysis buffer. RNA was  
103 then extracted using RNeasy Mini kit (Qiagen, cat number: 74104) as per manufacturer's instructions.  
104 Purified RNA was eluted in 40  $\mu$ L RNase-free H<sub>2</sub>O and the approximate concentration evaluated using  
105 a NanoDrop ND-1000 spectrophotometer. Approximately, 450 ng of purified RNA was converted to  
106 cDNA by using high-capacity reverse transcription kit (Applied Biosystems, cat number: 4368814). For  
107 each reaction, a mix of 2  $\mu$ L 10x RT buffer, 0.8  $\mu$ L 25x dNPT mix, 2  $\mu$ L 10x RT random primers, 1  $\mu$ L  
108 Multiscribe reverse transcriptase, 3.2  $\mu$ L nuclease free H<sub>2</sub>O and 11  $\mu$ L of RNA (40.9 ng/ $\mu$ L) was  
109 prepared. This was then primed at 25°C for 10 min, incubated at 37°C for 120 min and inactivated at  
110 85°C for 5 min in a thermal cycler (VWR UNO 96). cDNA was then stored at -20°C until further use. An  
111 overview of the transcriptomics workflow is given in **Figure 1**.

112 For the analysis of the transcriptomics data described in this study, FASTQ files were converted to  
113 Binary-sequence Alignment Format (BAM) files using HISAT2 (v2.1.0) and Samtools (v1.3).  
114 Subsequently, BAM files were imported into Perseus software (v1.6.0.2) and genome annotation was  
115 performed using the Human Fasta cDNA database (<http://www.ensembl.org>). Reads per kilo per  
116 million (RPKM) values were calculated by a normalization step dividing by the sum  
117 (Normalization $\rightarrow$ Divide), followed by dividing normalized values by gene length, multiplying by 10<sup>9</sup>,  
118 and taking the log<sub>2</sub> values. The transcriptomics data set was deposited in ArrayExpress (AE) at EBI  
119 [19].

120 **q-PCR.** For q-PCR, primers for selected genes of interest were designed using Primer BLAST (see Table  
121 1 for sequences), parameters included spanning exon-exon junctions, a target size of 200 bp and a  
122 maximum product size of 150. A Beta-Actin control gene was used as a reference [20]. A total of 20  
123  $\mu\text{g}$  of cDNA was used for each 20  $\mu\text{L}$  reaction, in combination with 200 nM of each forward and reverse  
124 primer (Invitrogen) and Fast SYBR Green Master Mix (Applied Biosystems, cat number: 4385612),  
125 according to the manufacturer's instructions. The reaction plates were run on a Roche Lightcycler 480,  
126 with an initial pre-incubation of 37°C for 30 sec, then denaturing at 95°C for 3 sec, followed by  
127 annealing at 60°C for 30 sec. Denaturing and annealing was repeated for 40 runs before conducting  
128 melt curve analysis. Using Roche Lightcycler analysis software, the noise band was altered to exclude  
129 any background noise whilst staying within the lower third of the linear section of the curve to gain  
130 initial Ct values. Average Ct values for Beta-Actin were then subtracted from average Ct values of  
131 target genes to get dCt. RIC vs non-RIC groups and different time points were then compared using  
132  $2^{-(x-y)}$  to obtain relative expression levels and plotted on a box-dot graph.

### 133 **Proteomics**

134 **Sample preparation.** In accordance with the transcriptomics study, sixteen tissue samples (weighing  
135 approximately 20 mg) were lysed using a Precellys 24 homogeniser (Bertin Instruments) in 30  $\mu\text{L}$  RIPA  
136 and 6M urea lysis buffer per 1 mg of tissue. Samples were reduced with 200 mM tris(2-  
137 carboxyethyl)phosphine (TCEP) at 55°C for 1 hour and alkylated with 375 mM iodoacetamide (IAA) for  
138 30 min at room temperature. Following this, protein precipitation via methanol/chloroform  
139 precipitation was performed. The resulting pellet was dried and resuspended in 50  $\mu\text{L}$   
140 triethylammonium bicarbonate (TEAB) and the protein concentration determined using a BCA assay  
141 (Pierce). In total, 100  $\mu\text{g}$  of protein was digested by trypsin using the SMART method (Thermo  
142 Scientific). In brief, each sample was loaded into a SMART digestion tube (Thermo Fisher Scientific,  
143 Cat no 60109-103) containing 150  $\mu\text{L}$  of SMART digestion buffer. These were then incubated at 70°C  
144 at 1400 rpm for 2 hours on a heat shaker (Eppendorf) and spun at 2500 x g for 5 min, with collection  
145 of the supernatant. Samples were de-salted using SOLA $\mu$  SPE plates (Thermo Scientific, Cat no 60109-

146 103). Columns were equilibrated using 100% acetonitrile (ACN), then 0.1% trifluoroacetic acid (TFA).  
147 The samples were then diluted with 1% TFA and pulled through the column using a vacuum pump.  
148 They were then washed with 0.01% TFA and eluted in 100  $\mu$ L 65% acetonitrile. Eluates were dried  
149 using a vacuum concentrator (SpeedVac, Thermo Scientific) and resuspended in 100  $\mu$ L of 100 mM  
150 TEAB for Tandem Mass Tag (TMT) labelling.

151 **TMT labelling and high pH fractionation.** TMT 10plex reaction groups were used to label the digested  
152 peptides. Groups comprised of 8 samples (4 sets of RIC and non-RIC) and two pools; one undiluted,  
153 and one 5 times diluted. For labelling, 41  $\mu$ L of TMT label was added to each sample and incubated for  
154 1 hour at room temperature. To quench the reaction, 8  $\mu$ L of 5% hydroxylamine was added to each  
155 sample and incubated at room temperature for 15 minutes. Equal volumes of each sample were then  
156 pooled into 2 groups, and de-salted using Sep-Pak C18 columns. The resulting eluent was dried using  
157 a vacuum concentrator (SpeedVac, Thermo Scientific) and resuspended in 120  $\mu$ L of buffer A (98%  
158 MilliQ-H<sub>2</sub>O, 2% acetonitrile, 0.1% TFA). The two combined TMT 10plex experiments were then pre-  
159 fractionated using high pH 10.0 reversed-phase liquid chromatography (HPLC) into a total of 60  
160 fractions. Fractions were subsequently concatenated into a total of 20 samples and submitted for LC-  
161 MS/MS analysis. The proteomic sample preparation strategy is summarized in **Figure 1**.

162 **Phosphoproteomics.** For phosphopeptide enrichment, 50  $\mu$ g of protein was removed from each of the  
163 16 tissue samples, and pooled into their respective RIC and non-RIC groups. Samples were reduced,  
164 alkylated, digested with trypsin, and desalted as above. Peptides (~400  $\mu$ g) were eluted from Sep-Pak  
165 cartridges in 500  $\mu$ L buffer B (65% ACN, 35% MilliQ-H<sub>2</sub>O, and 0.1% TFA). Phosphopeptide enrichment  
166 was performed using an Immobilized Metal Affinity Chromatography (IMAC) column with the aid of a  
167 Bravo Automated Liquid Handling Platform (Agilent).

168 **Mass Spectrometry analysis.** Liquid chromatography tandem mass spectrometry (LC-MS/MS)  
169 analysis was undertaken using a Dionex Ultimate 3000 nano-ultra reversed-phase HPLC system with  
170 on-line coupling to a Q Exactive High Field (HF) mass spectrometer (Thermo Scientific). Samples were

171 separated on an EASY-Spray PepMap RSLC C18 column (500 mm × 75 µm, 2 µm particle size; Thermo  
172 Fisher Scientific) over a 60 min gradient of 2–35% ACN in 5% dimethyl sulfoxide (DMSO), 0.1% FA, and  
173 the flow rate was ~ 250 nL/min. The mass spectrometer was operated in data-dependent analysis  
174 mode for automated switching between MS and MS/MS acquisition. Full MS survey scans were  
175 acquired from 400–2000 *m/z* at a resolution of 60,000 at 200 *m/z* and the top 12 most abundant  
176 precursor ions were selected for high collision energy dissociation fragmentation. MS2 fragment ion  
177 resolution was set to 15,000.

178 **Data analysis.** MS raw data files were searched using Proteome Discoverer (v2.3; total proteome) and  
179 MaxQuant (v1.5.14; phosphoproteome) software packages. Search parameters included the  
180 allowance of two missed trypsin cleavages. Carbamidomethylation (C) was set as a fixed modification,  
181 while TMT6plex (N-term, K), oxidation (M), deamidation (N, Q), and phosphorylation (STY) were set  
182 as variable modifications where appropriate. The data was searched against porcine protein  
183 sequences using the *UPR\_Sus scrofa* fasta file along with the corresponding decoy reverse database.  
184 Only unique and razor peptides were used for quantitation.

185 **Statistical analysis.** TMT 10plex quantitation and data analysis was performed in Perseus software  
186 (v1.6.0.2) which filtered out contaminant and false positive identifications (decoys). The data were  
187 log<sub>2</sub> transformed, and replicates were grouped into RIC and non-RIC. Missing values were imputed  
188 from the normal distribution and all samples were normalised by median subtraction. Hierarchical  
189 cluster analysis was performed on all the proteins identified by LC–MS/MS and visualised as heat maps  
190 using the Pearson correlation algorithm. Volcano plots were generated by applying parametric  
191 Student's t-tests between RIC and non-RIC controls, and using a Permutation FDR based correction for  
192 multiple testing. A Christmas tree plot was generated for the phosphoproteomics data where only one  
193 replicate was acquired. The mass spectrometry proteomics data have been deposited to the  
194 ProteomeXchange Consortium via the PRIDE [21] partner repository with the dataset identifier



195 PXD025273. Gene Ontology and biological pathway enrichment analysis was performed using STRING  
196 protein–protein interaction networks & functional enrichment analysis (<https://string-db.org/>).

197

## 198 **RESULTS and DISCUSSION**

199 IRI is one of the primary causes of AKI during renal transplantation, and strategies to minimise it are  
200 of urgent need [2]. Despite its early pre-clinical promise, the clinical utility of RIC has so far failed to  
201 live up to expectations [16]. As a result, attention has shifted to the molecular profiling of organ tissues  
202 in an attempt to decipher a more discreet subclinical response that may be triggered by RIC. Current  
203 clinical parameters may not be refined enough to show nuances which, if enhanced, could result in  
204 better outcomes. Using a cutting-edge integrative Omics strategy of transcriptomics, proteomics, and  
205 phosphoproteomics, we sought to better understand the molecular and systemic footprint that is  
206 inferred upon RIC in this porcine model of kidney transplantation.

207 We first performed RNA sequencing on kidney graft tissue to quantify changes at the transcriptome  
208 level (**Figure 1**). A total of 19,220 transcripts were successfully quantified across RIC and non-RIC  
209 groups (**Supplementary Table 1**). The majority of transcripts were found to be unchanged between  
210 groups. Nevertheless, 33 transcripts had at least a two-fold change in abundance between groups, at  
211 a *p*-value of  $\leq 0.05$  (**Figure 2, Supplementary Table 2**). The most notable of these included heat shock  
212 protein beta-1 (HSPB1), monocarboxylate transporter 4 (SLC16A3), C-X-C motif chemokine (CXCL13),  
213 C-C motif chemokine 2 (CCL2), interleukin-1 receptor type 2 (IL1R2), interleukin-1 beta (IL1B),  
214 leukotriene B4 receptor 1 (LTB4R), Na(+)/H(+) exchange regulatory cofactor NHE-RF4 (PDZD3), and  
215 Ras-like protein family member 10A (RASL10A), all of which were significantly down-regulated  
216 following RIC. Moreover, biological pathway analysis revealed a reduction in the transcripts of genes  
217 associated with regulation of inflammation following RIC as compared to their non-RIC counterparts  
218 (**Figure 2, Supplementary Figure 1**). Transcript changes were confirmed by performing qPCR on a  
219 selected panel of targets which were observed to be dysregulated in RIC in either our dataset, or as

220 described previously. We measured five genes in total in a pooled sample of each group, including  
221 IL1B, LTB4R, PDZD3, SLC16A3, and RASL10A (**Supplementary Table 3**). We observed a slight increase  
222 in RIC induced SLC16A3 transcripts, but overall, none of the genes quantified reached statistically  
223 significance between RIC and non-RIC, with all having a  $p$ -value of  $> 0.2$  (**Figure 3**).

224 Following the analysis of the kidney donor biopsies at the transcriptome level, we extended the study  
225 to measure changes between the kidney tissue proteomes of the respective RIC and non-RIC groups.  
226 Our advanced quantitative proteomic strategy (**Figure 1**) successfully quantified a total of 7,546  
227 proteins across all samples (**Supplementary Table 4**). Hierarchical clustering analysis revealed no clear  
228 discrimination between RIC and non-RIC groups at the proteome level (**Figure 2A**). Similarly, and in  
229 agreement with the transcriptomics results, the majority of proteins were found to be unchanged  
230 between groups. To determine if we could identify trends in the data, we took those proteins with the  
231 largest ( $\geq \log_2 0.5$ ), albeit non-significant, fold changes forward for further analysis. In this context, 252  
232 proteins were deemed to be differentially expressed between RIC and non-RIC groups  
233 (**Supplementary Table 5**). Mirroring the transcriptomics results, a dampening of immune response  
234 proteins was observed in RIC versus non-RIC tissue, whereby far the largest fold changes were  
235 observed in approximately 15 Ig-like domain-containing proteins (**highlighted in green in Figure 2B**).  
236 Attenuation of proteins involved in the inflammatory response associated with IRI could be one of the  
237 primary beneficial factors that could contribute to RIC renoprotection. This dampening may serve as  
238 a natural defence mechanism against the destruction caused by IRI. Despite this, the inflammatory  
239 response generally associated with renal transplantation, in the form of apoptotic cell death,  
240 macrophage and neutrophil infiltration, and anti-inflammatory cytokine production, was found to be  
241 unaffected by RIC in the pigs studied [22]. We performed pathway enrichment analysis on the  
242 differentially expressed proteins. Unfortunately, the Ig-like species described above could not be  
243 included due to lacking a mature porcine gene entry (**Supplementary Figure 2**). Mirroring the human  
244 CONTEXT study [18], there was an accumulation of muscle-derived and extracellular matrix assembly  
245 proteins in the renal tissue following RIC, including the collagens COL1A2, COL2A1, COL4A2, COL4A,

246 COL6A3, fibrillin and fibulin (**Figure 2, Supplementary Figure 2**), although no tourniquet on a limb but  
247 rather clamping of the aorta was used in the present porcine study. Additionally, upregulation of  
248 factors associated with innate immunity such as lysosome-associated membrane glycoprotein 1  
249 (LAMP1), neutrophil cytosol factor 2 (NCF2), leucine-rich alpha-2-glycoprotein (LRG1),  
250 myeloperoxidase (MPO), and properdin (CFP) were observed, suggesting the technique provoked the  
251 activation of tissue remodelling cascades within the organ itself. Upregulation of these factors provide  
252 a favourable environment for wound-healing and repair, and collagen scaffolds have been shown to  
253 enhance survival of transplanted cardiomyoblasts and improve function in ischaemic rat hearts [23].  
254 Increased collagen production has also been associated with a response to the hypoxic or anoxic  
255 conditions inherent to surgery, ultimately leading to adhesion development [24]. It is, however,  
256 unclear if these proteins provide a protective mechanism in RIC, or are a consequence of tissue  
257 damage which could lead to fibrosis. Furthermore, we identified an up-regulation of several  
258 components of the blood coagulation cascade, including Vitamin K-dependent protein C (PROC),  
259 Fibrinogen beta chain (FGB), and Plasminogen (PLG). Interestingly, SLC16A3, IL1B, LTB4R, RASL10A,  
260 and CXCL13, which were found to have some of the largest changes at the transcript level, were not  
261 detected at the proteome level, while HSPB1, LTB4R, and PDZD3 transcripts were differentially  
262 abundant, but found to be unchanged between non-RIC and RIC groups at the protein level.

263 To gain more insight into the signalling dynamics underlying these molecular changes in kidney tissue,  
264 we performed phosphoproteomics to compare a global pool of all 8 RIC samples to that of the 8 non-  
265 RIC controls. We identified 3,524 phosphosites across both groups, from a total of 3,626 proteins  
266 (**Supplementary Table 6**). No substantial differences were identified in the phosphoproteome  
267 between RIC and non-RIC groups, indicating little steady-state effects of RIC on kidney tissue at the  
268 indicated time points (**Supplementary Figure 3**).

269 To determine if a joint analysis could reveal useful insights that could not be deciphered from  
270 individual analysis alone, we integrated the transcriptomic and proteomic datasets (**Figure 4A**). Once

271 again, the Ig-like proteins that were found to be down-regulated in RIC in the proteomics dataset alone  
272 (**Figure 2B**) could not be included in this type of analysis due to a lack of matching cognate sequences  
273 at the transcriptome level. A low correlation was observed between the two datasets, with a Pearson  
274 correlation coefficient of 0.017. We subsequently performed 2D Annotation Enrichment Analysis in  
275 an effort to identify pathways which were simultaneously up- or down-regulated in both datasets [25].  
276 Up-regulated pathways in RIC versus non-RIC and common to both datasets included muscle tissue  
277 development/remodelling, extracellular matrix disassembly, ubiquitin-specific protease activity, and  
278 steroid hormone receptor activity (**Figure 4**). Conversely, down-regulated pathways in RIC versus non-  
279 RIC and common to both included kidney development, vasodilation, epidermal growth factor  
280 receptor signalling, and the regulation of myoblast differentiation.

281 A possible explanation for the absence of significant proteomic and transcriptomic changes may be  
282 attributed to the condition of kidney tissue used in this study. The tissue had been through multiple  
283 insults, including brain death, periods of cold and warm ischemia and reperfusion. This makes it  
284 increasingly difficult to fully dissect the (perhaps comparatively minor) effect of RIC, despite a more  
285 aggressive RIC regimen than that in the human setting. A limiting factor of this study concerning Omics  
286 profiling is the low number of available samples, and the timepoint at which the analysed biopsies  
287 were taken. The end biopsies profiled for transcriptomics and proteomics were taken at termination  
288 after a 10-hour observation phase. Theoretically, this time period may be sufficient to induce a  
289 measurable change in gene expression, however it's possible that gene expression returns to that  
290 more similar to pre-RIC. Additionally, it may also be too early of a time point to measure a significant  
291 change in protein expression, which is possibly reflected in the lack of change identified at the  
292 proteomic depth achieved in this study. Ideally, there would be an observation phase of several days  
293 with multiple biopsies, however, this would require a survival model which was not feasible in  
294 combination with the severity of the RIC regimen.

295

296 **CONCLUSIONS**

297 In summary, RIC of the recipient before kidney graft reperfusion does not result in substantial  
298 molecular perturbations in the graft compared to non-RIC controls, which was confirmed by validation  
299 of selected candidates. The data did suggest, however, that the administered RIC caused tissue  
300 leakage and a potentially detrimental accumulation of muscle proteins in the kidney graft tissue, but  
301 also triggered an interplay between the innate and adaptive immune response, with a dampening of  
302 the latter. Ultimately however, our discovery studies showed no major differences in the  
303 transcriptomes and proteomes of porcine kidney transplant tissue following RIC, despite excellent  
304 depth of coverage in each.

305

306 **LIST OF ABBREVIATIONS**

307 AKI – Acute Kidney Injury

308 ATP – adenosine triphosphate

309 GFR – Glomerular Filtration Rate

310 IRI – Ischemic/Reperfusion Injury

311 RIC – Remote Ischemic Preconditioning

312 TMT – Tandem Mass Tag

313

314 **DECLARATIONS**

315 **ETHICS APPROVAL AND CONSENT TO PARTICIPATE**

316 Porcine kidney donor samples were taken from the porcine RIC study [17].

317 **CONSENT FOR PUBLICATION**

318 All authors have read the manuscript and given their consent for publication.

### 319 **AVAILABILITY OF DATA AND MATERIALS**

320 The mass spectrometry raw data files have been deposited under PRIDE Submission PXD025273. The  
321 transcriptomics data is available upon request to the authors.

### 322 **COMPETING INTERESTS**

323 The authors have no conflicts of interest to declare

### 324 **FUNDING**

325 Funding was provided by the Novo Nordisk Foundation, The Danish Medical Research Council, The  
326 Danish Kidney Association (Nyreforeningen), Department of Clinical Medicine, Aarhus University,  
327 Nuffield Department of Medicine, University of Oxford, and Nuffield Department of Surgical Sciences,  
328 University of Oxford.

### 329 **AUTHORS CONTRIBUTIONS**

330 DOB, AT, HH, XY, PS, KR and NS performed the experiments. BJ, RJP and BMK conceptualised the study.  
331 DOB, AT, BJ, RJP and BMK wrote the manuscript. DOB, AT, HH, LX, PS, KR and NS analysed the data.  
332 All authors read and approved the final manuscript.

### 333 **ACKNOWLEDGEMENTS**

334 The authors would like to thank members of the Kessler, Jespersen, and Ploeg research groups for  
335 helpful discussions and technical support.

### 336 **AUTHORS' INFORMATION**

337 Darragh P O'Brien and Adam M Thorne contributed equally to the work

338

339

340 ***Affiliations***

341 **Target Discovery Institute, Centre for Medicines Discovery, Nuffield Department of Medicine,**

342 **University of Oxford, UK**

343 Darragh P O'Brien, Adam M Thorne, Honglei Huang, Xuan Yao, Benedikt M Kessler

344 **Nuffield Department of Surgical Sciences and Oxford Biomedical Research Centre, University**

345 **of Oxford, UK**

346 Adam M Thorne, Honglei Huang, Rutger J Ploeg

347 **Department of Renal Medicine, Aarhus University Hospital, Aarhus, Denmark**

348 Bente Jespersen, Peter Søndergaard Thyrestrup, Kristian Ravlo

349 Department of Anaesthesiology, Aalborg University Hospital, Aalborg Denmark

350 Peter Syndergaard Thyrestrup

351 **Department of Clinical Medicine, Aarhus University, Aarhus, Denmark**

352 Rikke Norregaard, Bente Jespersen, Kristian Ravlo and Niels Secher

353 **Department of Anesthesiology and Intensive Care Medicine, Aarhus University Hospital, Aarhus**

354 **Denmark**

355 Niels Secher

356

357

358

359

360

361

362 **FIGURE LEGENDS**

363 **Figure 1. Overview of transcriptomic and proteomic workflows.** A) For transcriptomics, tissue  
364 samples were cut, weight and lysed. RNA was extracted, followed by cDNA library preparation, and  
365 the difference in transcript level determined between non-RIC and RIC groups. For selected targets of  
366 interest, qPCR was undertaken. B) In the proteomics arm, proteins were extracted, reduced, alkylated  
367 and subjected to methanol/chloroform extraction, digested with trypsin, cleaned-up and subjected to  
368 10plex TMT labelling. Labelled peptides were separated by high pH-RP, prior to analysis by LC-MS/MS.  
369 The green boxes outline our sample pooling and fractionation strategy. A total of 16 tissue samples  
370 (and 4 pools) were labelled across two TMT 10plex kits. Each TMT experiment was subsequently  
371 separated into 100 fractions, which were then concatenated down into 20 fractions. This resulted in  
372 a final total of 40 samples for injection into the mass spectrometer.

373 **Figure 2. Transcriptome and proteome changes by RIC** A) Hierarchical clustering analysis of RIC and  
374 non-RIC proteomes. B) Volcano plots displaying differential transcriptome expression on the left, and  
375 differential proteome expression on the right. The x-axis measures expression difference by  $\log_2(\text{fold change})$ , and the y-axis indicates statistical significance by  $-\log_{10}(p\text{-value})$ . Down-regulated species are  
376 coloured blue, while their up-regulated counterparts are coloured red. C) Enriched biological  
377 processes (Gene Ontology) determined from differentially-regulated transcripts and proteins  
378 (displayed by their gene symbol).

380 **Figure 3. Minimal transcriptional alteration by RIC.** No statistically significant difference was  
381 observed for any of the selected qPCR targets (IL1B, LTB4R, PDZD3, SLC16A3, and RASL10A) between  
382 RIC and non-RIC groups, with all  $p$ -values  $> 0.2$ .

383 **Figure 4. Integrated Omics reveals RIC induced tissue leakage and reduced inflammation.** A) Scatter  
384 plot of the  $\log_2\text{-fold-change}$  between RIC and non-RIC groups of the proteomics on the x-axis, versus  
385 the transcriptomics on the y-axis. Species which are down-regulated in both datasets are coloured  
386 blue, while their up-regulated counterparts are coloured red. A low Pearson correlation coefficient of



387 0.017 was observed. B) 2D Annotation Enrichment Analysis generated using transcripts and proteins  
388 which were commonly dysregulated across the two datasets.

389

390 **Supplementary Figure S1. Transcriptomic pathway enrichment analysis reveals subtle alteration of**  
391 **tissue inflammation by RIC.** All transcripts (n=33) which were found to be dysregulated in RIC versus  
392 non-RIC controls were searched against the *Sus scrofa* database in STRING. Only interactions of the  
393 highest confidence (scores > 0.90) were included in the analysis. Genes associated with immune  
394 regulation are highlighted, with those linked to interleukin biology coloured red, while cytokines are  
395 coloured purple.

396 **Supplementary Figure S2. Proteomic pathway enrichment analysis uncovers RIC induced tissue**  
397 **leakage and altered inflammation.** Proteins (n=252) which were found to have the greatest  
398 dysregulation in RIC versus non-RIC controls were searched against the *Sus scrofa* database in STRING.  
399 Only interactions of the highest confidence (scores > 0.90) were included in the analysis.  
400 Proteins/genes of interest are highlighted, with proteins associated with muscle and ECM coloured in  
401 blue, blood coagulation in green, and factors associated with innate immunity coloured red.

402 **Supplementary Figure S3. Kidney tissue phosphoproteomics unaffected by RIC.** A) Abundance plots  
403 indicate no significant difference in the phosphoproteome between RIC and control groups. B) A  
404 Christmas tree plot, with Significance B thresholds colour coded. Minor changes were observed  
405 between groups.

406

407 **Table 1: List of gene names and primer sequences used to conduct qPCR.** A total of five genes were  
408 selected for qPCR validation of transcriptomics results, with beta actin serving as a control.

409 **Supplementary Table 1: List of transcripts identified by transcriptomics.** A total of 19,220 transcripts  
410 were successfully identified across groups.

411 **Supplementary Table 2: *Transcripts differentially expressed between RIC and Non-RIC groups.***

412 **Supplementary Table 3: *qPCR validation on a panel of targets from discovery transcriptomics.*** IL1B,  
413 LTB4R, PDZD3, SLC16A3, and RASL10A were quantified by qPCR. We observed a slight increase in RIC  
414 induced SLC16A3 transcripts, but overall, none of the genes quantified reached statistically  
415 significance between RIC and non-RIC, with all having a *p*-value of > 0.2

416 **Supplementary Table 4: *List of proteins identified by proteomics.*** A total of 7,546 proteins were  
417 successfully identified across groups.

418 **Supplementary Table 5: *Proteins differentially expressed between RIC and Non-RIC groups.***

419 **Supplementary Table 6: *List of proteins and phosphosites identified by phosphoproteomics.*** A total  
420 of 3,524 phosphosites were successfully identified across groups.

421

422

423

## 424 TABLES

| Oligo Name | Forward Sequence (5' - 3') | Reverse Sequence (5' - 3') | Scale (μmole) |
|------------|----------------------------|----------------------------|---------------|
| PDZD3      | CCCTGTAAGTGCCTGCTAT        | CTCCAGGGATCAGAAGGATCG      | 0.025μmole    |
| LTB4R      | TGGTACTTCCTCTGGCTGA        | CCATTGCAAGGACAGGCTTT       | 0.025μmole    |
| RASL10A    | TTGCATTTGGGGTAAACCTGGAA    | GCCACTCCTCCAAGCTTAATTC     | 0.025μmole    |
| SLC16A3    | AGGTAACCTGAGACCTGGCT       | TGGTTCCGCGTCCCTGG          | 0.025μmole    |
| IL1B       | CCAATTCAGGGACCCTACCC       | GTTTGGGTGCAGCACTTCAT       | 0.025μmole    |
| Beta Actin | TGTCATGGACTCTGGGGATG       | GGGCAGCTCGTAGCTCTTCT       | 0.025μmole    |

425

426 **Table 1: List of gene names and primer sequences used to conduct qPCR.** A total of five genes were  
427 selected for qPCR validation of transcriptomics results, with beta actin serving as a control.

428

429

430

431 REFERENCES

- 432 1. Wu, M.Y., et al., *Current Mechanistic Concepts in Ischemia and Reperfusion Injury*. Cell Physiol  
433 Biochem, 2018. **46**(4): p. 1650-1667.
- 434 2. Zhao, H., et al., *Ischemia-Reperfusion Injury Reduces Long Term Renal Graft Survival:  
435 Mechanism and Beyond*. EBioMedicine, 2018. **28**: p. 31-42.
- 436 3. Sharfuddin, A.A. and B.A. Molitoris, *Pathophysiology of ischemic acute kidney injury*. Nat Rev  
437 Nephrol, 2011. **7**(4): p. 189-200.
- 438 4. Zhou, D., et al., *Remote ischemic conditioning: a promising therapeutic intervention for multi-  
439 organ protection*. Aging (Albany NY), 2018. **10**(8): p. 1825-1855.
- 440 5. Thuret, R., et al., *Ischemic pre- and post-conditioning: current clinical applications*. Prog Urol,  
441 2014. **24 Suppl 1**: p. S56-61.
- 442 6. Jiang, T., et al., *The Role of Remote Ischemic Preconditioning in Ischemia-Reperfusion Injury in  
443 Rabbits with Transplanted Lung*. Clin Lab, 2015. **61**(5-6): p. 481-6.
- 444 7. Vasdekis, S.N., et al., *The role of remote ischemic preconditioning in the treatment of  
445 atherosclerotic diseases*. Brain Behav, 2013. **3**(6): p. 606-16.
- 446 8. Vrakas, G., et al., *Synergistic Effect of Ischemic Preconditioning and Antithrombin in Ischemia-  
447 Reperfusion Injury*. Exp Clin Transplant, 2017. **15**(3): p. 320-328.
- 448 9. Magyar, Z., et al., *Beneficial effects of remote organ ischemic preconditioning on micro-  
449 rheological parameters during liver ischemia-reperfusion in the rat*. Clin Hemorheol Microcirc,  
450 2018. **70**(2): p. 181-190.
- 451 10. Saeki, I., et al., *Ischemic preconditioning and remote ischemic preconditioning have protective  
452 effect against cold ischemia-reperfusion injury of rat small intestine*. Pediatr Surg Int, 2011.  
453 **27**(8): p. 857-62.
- 454 11. Qi, B., et al., *Effect of remote ischemic preconditioning among donors and recipients following  
455 pediatric liver transplantation: A randomized clinical trial*. World J Gastroenterol, 2021. **27**(4):  
456 p. 345-357.
- 457 12. Wu, G., et al., *Effect of remote ischemic preconditioning on hepatic ischemia-reperfusion injury  
458 in patients undergoing liver resection: a randomized controlled trial*. Minerva Anestesiol, 2020.  
459 **86**(3): p. 252-260.
- 460 13. Tuncer, F.B., et al., *Ischemic Preconditioning and Iloprost Reduces Ischemia-Reperfusion Injury  
461 in Jejunal Flaps: An Animal Model*. Plast Reconstr Surg, 2019. **144**(1): p. 124-133.
- 462 14. Jung, K.W., et al., *Effect of Remote Ischemic Preconditioning Conducted in Living Liver Donors  
463 on Postoperative Liver Function in Donors and Recipients Following Liver Transplantation: A  
464 Randomized Clinical Trial*. Ann Surg, 2020. **271**(4): p. 646-653.
- 465 15. Fuller, T.F., et al., *Ischemic preconditioning improves rat kidney graft function after severe  
466 ischemia/reperfusion injury*. Transplant Proc, 2005. **37**(1): p. 377-8.
- 467 16. Krogstrup, N.V., et al., *Remote Ischemic Conditioning on Recipients of Deceased Renal  
468 Transplants Does Not Improve Early Graft Function: A Multicenter Randomized, Controlled  
469 Clinical Trial*. Am J Transplant, 2017. **17**(4): p. 1042-1049.
- 470 17. Soendergaard, P., et al., *Improved GFR and renal plasma perfusion following remote ischaemic  
471 conditioning in a porcine kidney transplantation model*. Transpl Int, 2012. **25**(9): p. 1002-12.
- 472 18. Thorne, A.M., et al., *Subclinical effects of remote ischaemic conditioning in human kidney  
473 transplants revealed by quantitative proteomics*. Clin Proteomics, 2020. **17**(1): p. 39.
- 474 19. Athar, A., et al., *ArrayExpress update - from bulk to single-cell expression data*. Nucleic Acids  
475 Res, 2019. **47**(D1): p. D711-d715.
- 476 20. Li, Q., et al., *Evaluation of potential reference genes for relative quantification by RT-qPCR in  
477 different porcine tissues derived from feeding studies*. Int J Mol Sci, 2011. **12**(3): p. 1727-34.
- 478 21. Perez-Riverol, Y., et al., *The PRIDE database and related tools and resources in 2019: improving  
479 support for quantification data*. Nucleic Acids Res, 2019. **47**(D1): p. D442-d450.

- 480 22. Secher, N., et al., *No effect of remote ischaemic conditioning on inflammation in a porcine*  
481 *kidney transplantation model*. *Transpl Immunol*, 2014. **31**(2): p. 98-104.
- 482 23. Kutschka, I., et al., *Collagen matrices enhance survival of transplanted cardiomyoblasts and*  
483 *contribute to functional improvement of ischemic rat hearts*. *Circulation*, 2006. **114**(1 Suppl):  
484 p. I167-73.
- 485 24. Saed, G.M. and M.P. Diamond, *Hypoxia-induced irreversible up-regulation of type I collagen*  
486 *and transforming growth factor-beta1 in human peritoneal fibroblasts*. *Fertil Steril*, 2002.  
487 **78**(1): p. 144-7.
- 488 25. Cox, J. and M. Mann, *1D and 2D annotation enrichment: a statistical method integrating*  
489 *quantitative proteomics with complementary high-throughput data*. *BMC Bioinformatics*,  
490 2012. **13 Suppl 16**(Suppl 16): p. S12.
- 491

## RIC REGIME

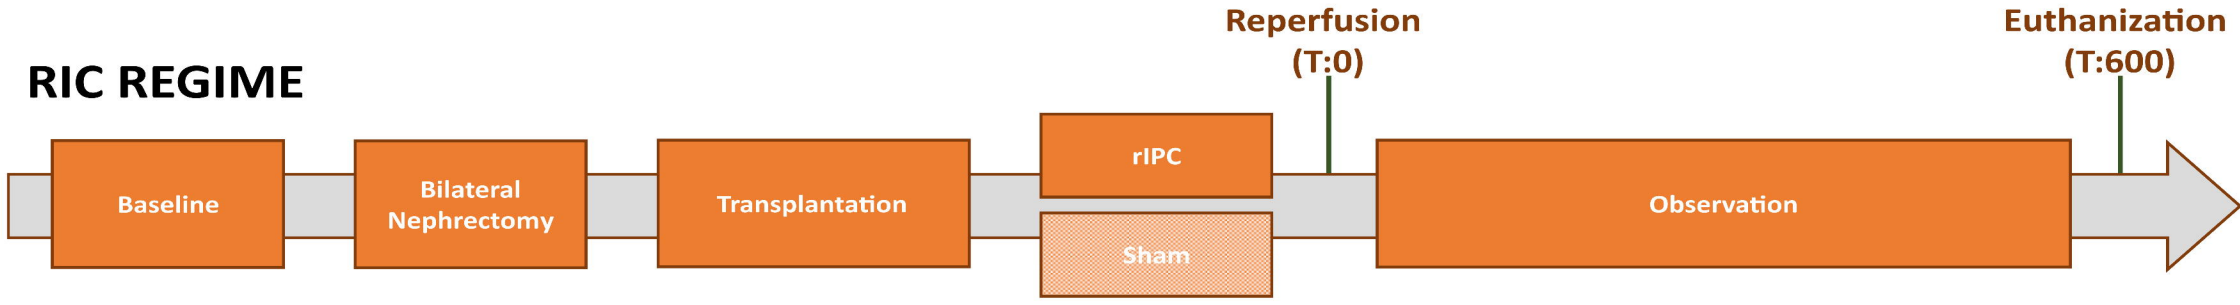

## TRANSCRIPTOMICS

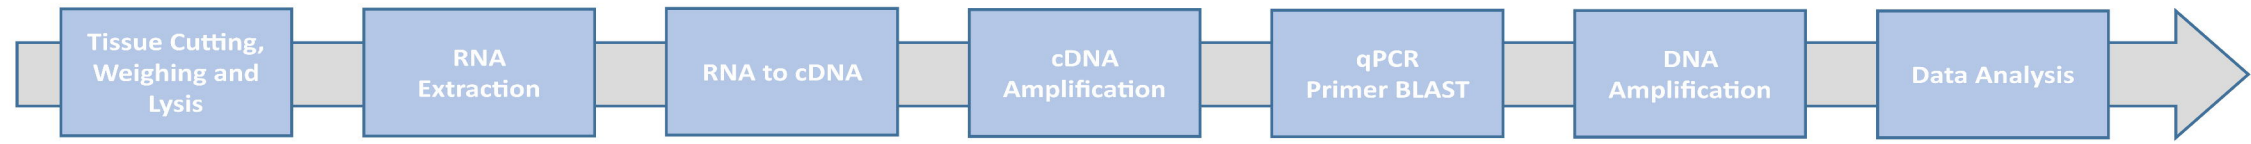

## PROTEOMICS

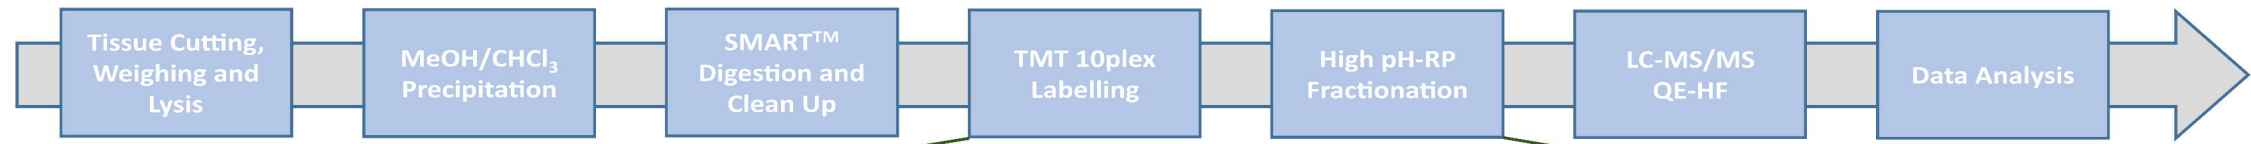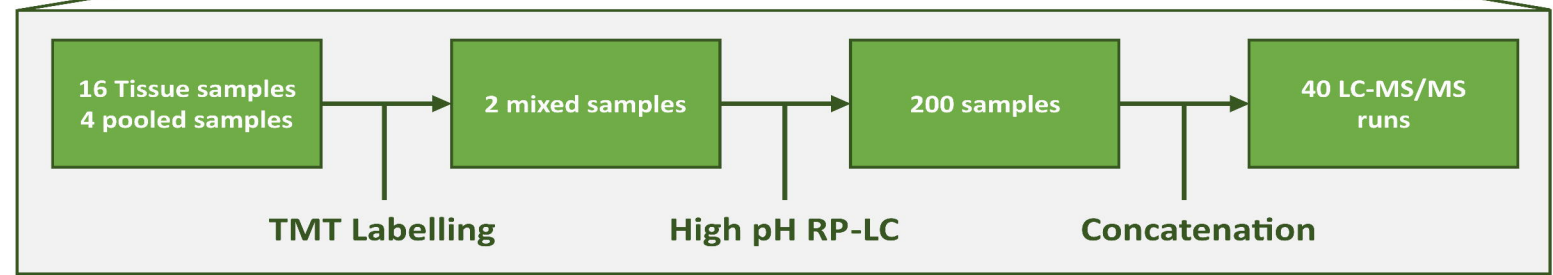

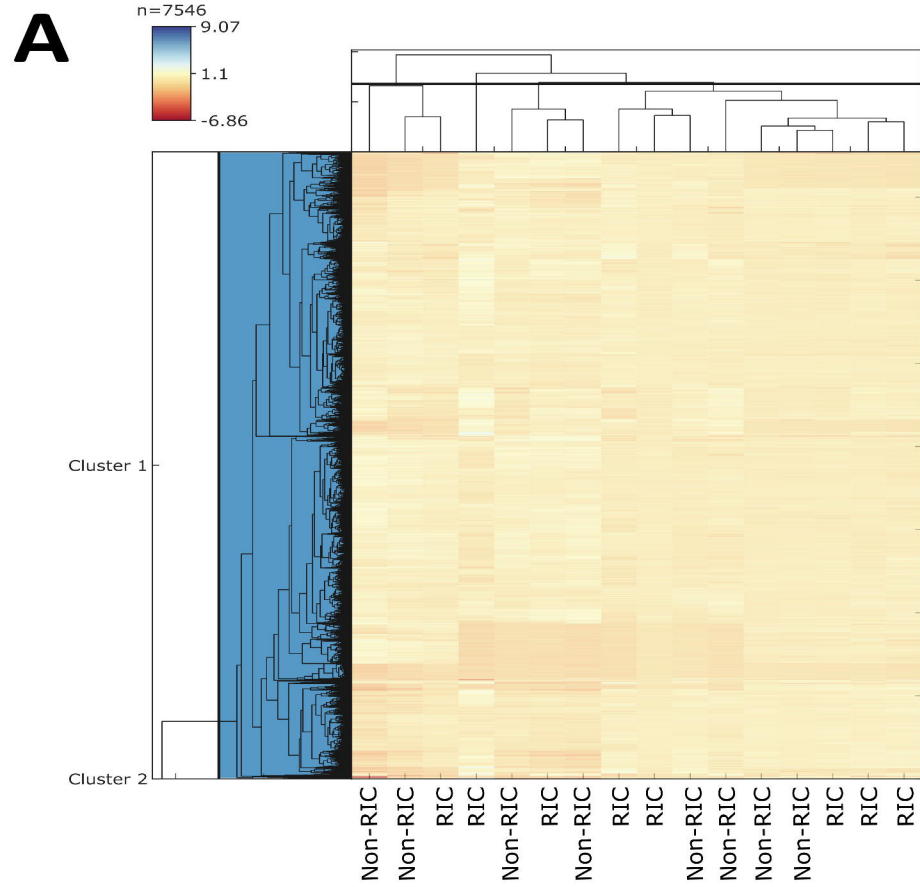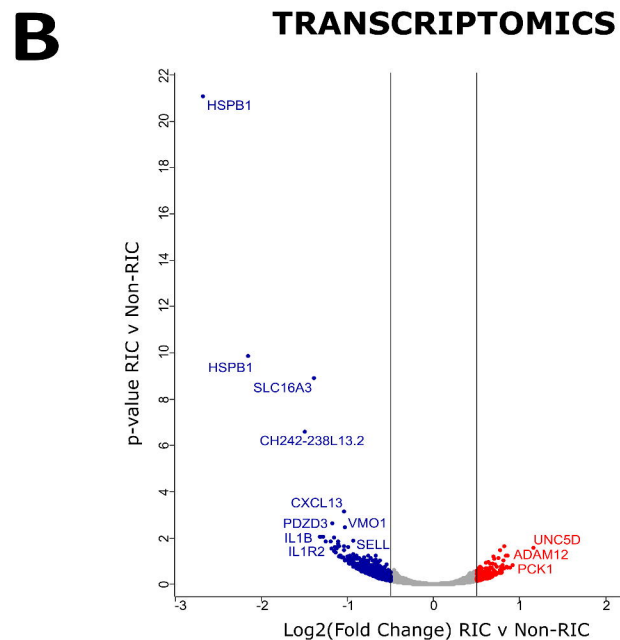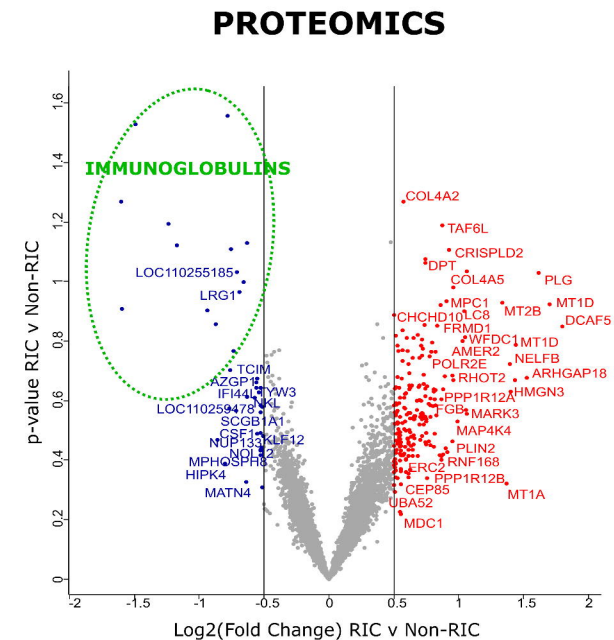

**C**

| Biological Process (Gene Ontology) |                                                        |                  |          |                      |
|------------------------------------|--------------------------------------------------------|------------------|----------|----------------------|
| GO-term                            | description                                            | count in network | strength | false discovery rate |
| GO:0044344                         | cellular response to fibroblast growth factor stimulus | 2 of 6           | 2.46     | 0.0142               |
| GO:0071347                         | cellular response to interleukin-1                     | 2 of 10          | 2.24     | 0.0142               |
| GO:0030593                         | neutrophil chemotaxis                                  | 2 of 12          | 2.24     | 0.0142               |
| GO:0002688                         | regulation of leukocyte chemotaxis                     | 2 of 12          | 2.16     | 0.0142               |
| GO:0070098                         | chemokine-mediated signaling pathway                   | 2 of 13          | 2.12     | 0.0142               |
| GO:0071222                         | cellular response to lipopolysaccharide                | 2 of 17          | 2.01     | 0.0142               |
| GO:0071356                         | cellular response to tumor necrosis factor             | 2 of 20          | 1.94     | 0.0142               |
| GO:0045786                         | negative regulation of cell cycle                      | 2 of 29          | 1.78     | 0.0142               |
| GO:0019221                         | cytokine-mediated signaling pathway                    | 3 of 56          | 1.67     | 0.0142               |
| GO:0006954                         | inflammatory response                                  | 3 of 62          | 1.62     | 0.0142               |
| GO:0006928                         | movement of cell or subcellular component              | 3 of 66          | 1.59     | 0.0142               |
| GO:0022603                         | regulation of anatomical structure morphogenesis       | 2 of 49          | 1.55     | 0.0142               |
| GO:0015031                         | protein transport                                      | 2 of 53          | 1.51     | 0.0142               |
| GO:0051050                         | positive regulation of transport                       | 2 of 59          | 1.47     | 0.0147               |
| GO:0016192                         | vesicle-mediated transport                             | 2 of 64          | 1.43     | 0.0154               |
| GO:0002682                         | regulation of immune system process                    | 3 of 103         | 1.4      | 0.0142               |

| Reactome Pathways |                                                              |                  |          |                      |
|-------------------|--------------------------------------------------------------|------------------|----------|----------------------|
| pathway           | description                                                  | count in network | strength | false discovery rate |
| SSC-419037        | NCAM1 Interactions                                           | 3 of 15          | 1.34     | 0.0244               |
| SSC-1442490       | Collagen degradation                                         | 4 of 38          | 1.06     | 0.0244               |
| SSC-3000178       | ECM proteoglycans                                            | 4 of 40          | 1.04     | 0.0244               |
| SSC-1650814       | Collagen biosynthesis and modifying enzymes                  | 5 of 55          | 1.0      | 0.0212               |
| SSC-216083        | Integrin cell surface interactions                           | 5 of 64          | 0.93     | 0.0244               |
| SSC-2022090       | Assembly of collagen fibrils and other multimeric structures | 4 of 53          | 0.92     | 0.0376               |
| SSC-2565942       | Regulation of PLK1 Activity at G2/M Transition               | 5 of 69          | 0.9      | 0.0244               |
| SSC-4420097       | VEGFA-VEGFR2 Pathway                                         | 5 of 74          | 0.87     | 0.0244               |
| SSC-195258        | RHO GTPase Effectors                                         | 11 of 213        | 0.75     | 0.0014               |
| SSC-69275         | G2/M Transition                                              | 7 of 146         | 0.72     | 0.0244               |
| SSC-194315        | Signaling by Rho GTPases                                     | 14 of 331        | 0.67     | 0.0014               |
| SSC-9006934       | Signaling by Receptor Tyrosine Kinases                       | 11 of 339        | 0.55     | 0.0244               |
| SSC-2262753       | Cellular responses to stress                                 | 9 of 279         | 0.55     | 0.0289               |
| SSC-6798695       | Neutrophil degranulation                                     | 12 of 382        | 0.54     | 0.0212               |
| SSC-168249        | Innate Immune System                                         | 18 of 707        | 0.45     | 0.0148               |
| SSC-168256        | Immune System                                                | 24 of 1240       | 0.33     | 0.0244               |

## IL1B

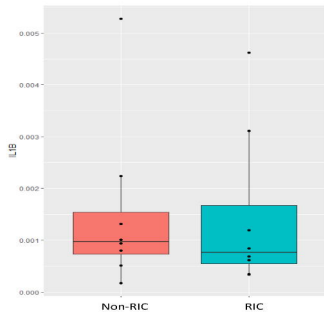

## LTB4R

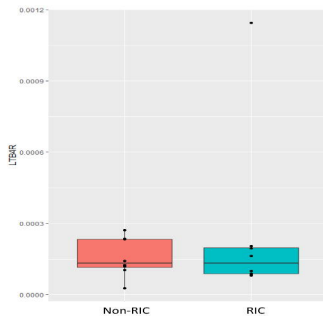

## PDZD3

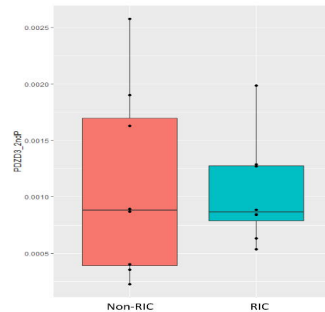

## SLC16A3

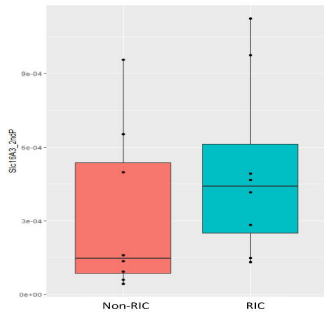

## RASL10A

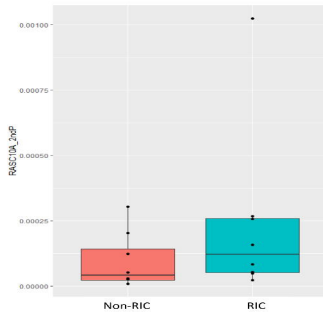

| Gene    | <i>p</i> -value<br>(RIC v Non-RIC) |
|---------|------------------------------------|
| IL1B    | 0.942122575                        |
| LTB4R   | 0.414858107                        |
| PDZD3   | 0.842717016                        |
| SLC16A3 | 0.207829143                        |
| RASL10A | 0.284549205                        |

**A****TRANSCRIPTOMICS**  
Difference RIC v Non-RIC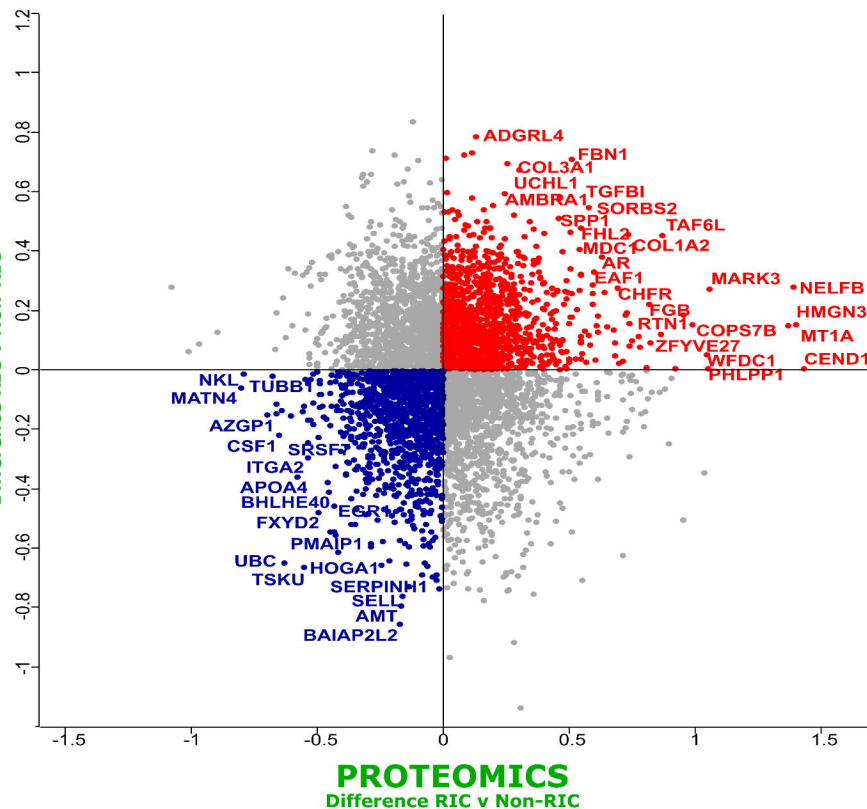**B****TRANSCRIPTOMICS**  
Difference RIC v Non-RIC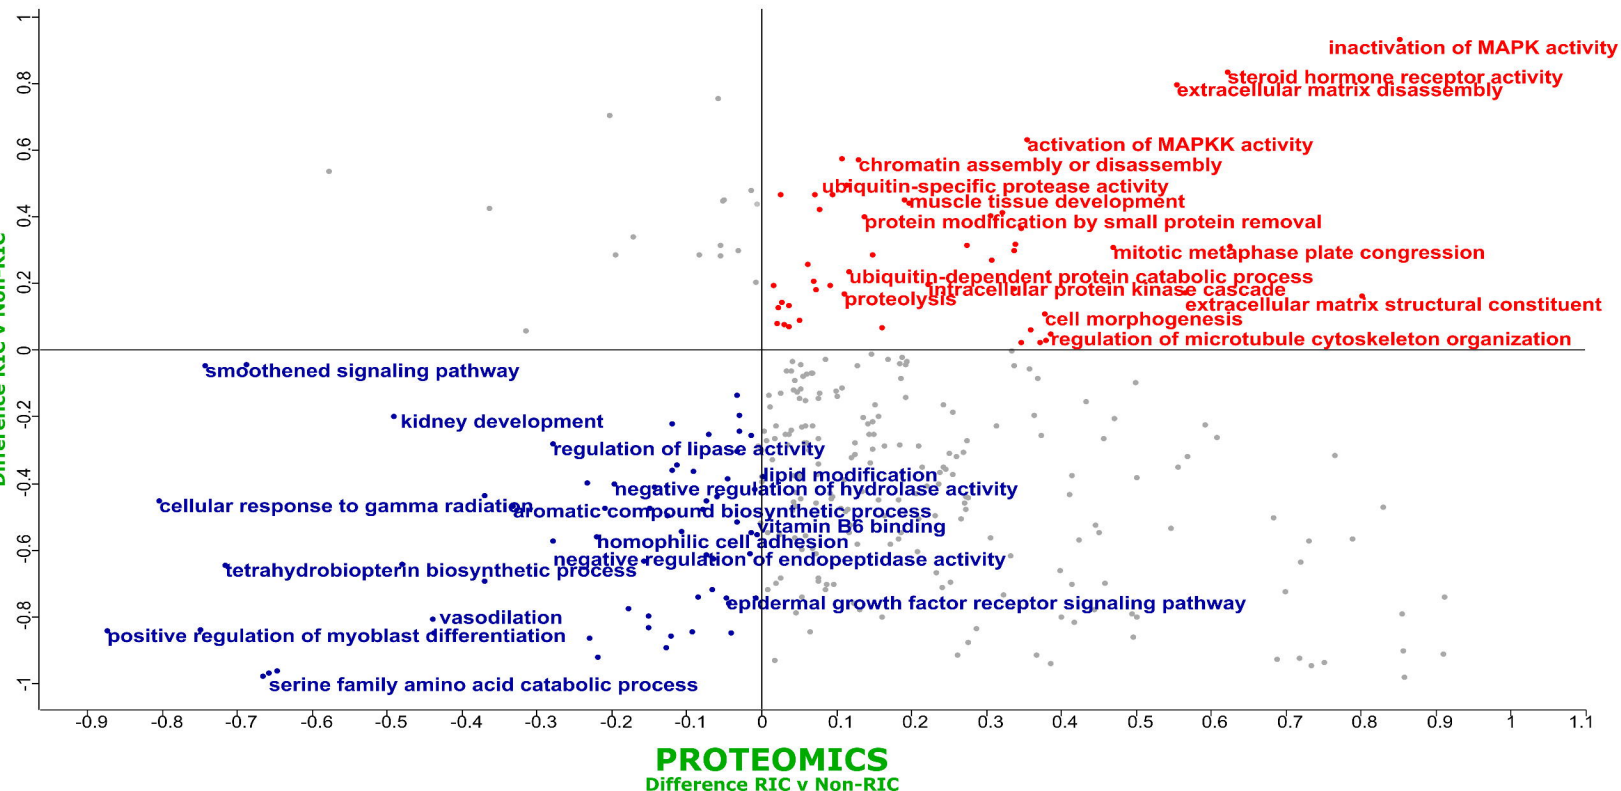

Source: https://www.biorxiv.org/content/10.1101/2021.04.23.441109v1.full.pdf
